# Supplementary material
Source: bioRxiv or medRxiv preprint supplement (https://www.biorxiv.org/highwire/filestream/49291/field_highwire_adjunct_files/3/165902-4.pdf)
Supplement: Supplementary file [file 165902-4.pdf]

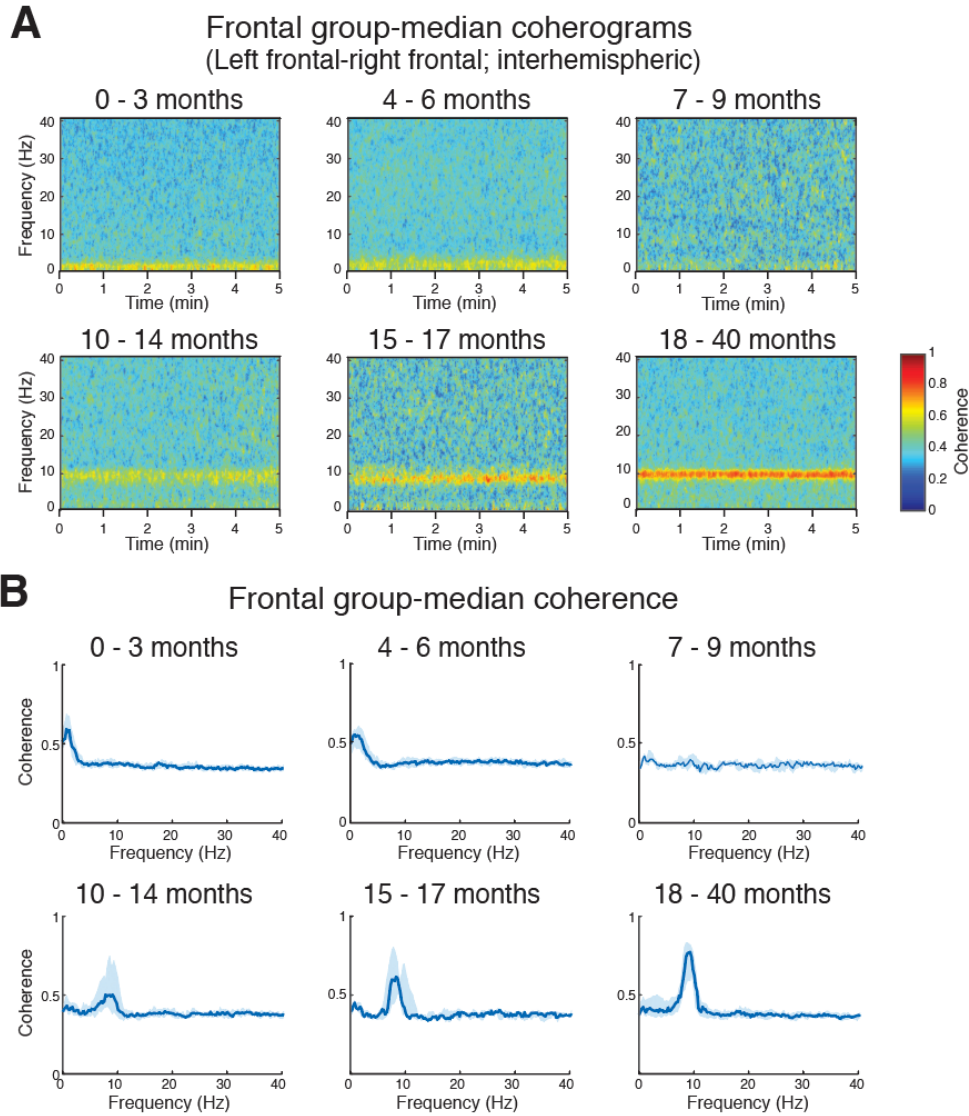

**Figure 6 – figure supplement 1.** Frontal coherence properties across age-groups.

Frontal group-averaged (A) coherograms and (B) frontal group-median coherence across all frequencies in children from 0-3 ( $n=17$ ), 4-6 ( $n=23$ ), 7-9 ( $n=7$ ), 10-14 ( $n=18$ ), 15-17 ( $n=7$ ) and 18-40 ( $n=19$ ) months of age. Left frontal (F7-Fp1) to right frontal (F8-Fp2) coherence is shown. Frontal group-median coherence showed slow and delta oscillations were highly coherent in young infants but not in infants older than 8 months, while alpha oscillations became coherent around 10-14 months of age. For coherence: solid line, median; shaded area, 25<sup>th</sup>-75<sup>th</sup> percentile. F7 electrode presented using nearest neighbor Laplacian referencing. Epoch size of 5 minutes is used.
